# Supplementary material
Source: PubMed Central journal article supplement (PMC6754304)
Supplement: NIHMS1537479-supplement-8.pdf [file NIHMS1537479-supplement-8.pdf]

**Table S1. Data collection and refinement statistics, HopBF1 structures (Related to Figure 1).**

| <b>Data collection</b>                                          |                                              |                            |                            |
|-----------------------------------------------------------------|----------------------------------------------|----------------------------|----------------------------|
| Crystal                                                         | HopBF1 Hg derivative (Hg peak <sup>a</sup> ) | Native HopBF1              | Native HopBF1 + AMP-PNP    |
| Space group                                                     | R32                                          | R32                        | R32                        |
| Cell constants (Å)                                              | a = 135.35, c = 124.35                       | a = 134.95, c = 124.49     | a = 76.19, c = 351.36      |
| Wavelength (Å)                                                  | 1.00700                                      | 1.00700                    | 0.97919                    |
| Resolution range (Å)                                            | 42.65 – 2.90 (2.95 – 2.90)                   | 42.60 – 2.47 (2.51 – 2.47) | 36.22 – 1.90 (1.93 – 1.90) |
| Unique reflections                                              | 9,875 (504)                                  | 15,724 (770)               | 31,760 (1,546)             |
| Multiplicity                                                    | 16.5 (11.1)                                  | 18.1 (16.4)                | 3.8 (3.7)                  |
| Data completeness (%)                                           | 100.0 (99.4)                                 | 100.0 (100.0)              | 99.7 (100.0)               |
| $R_{\text{merge}}$ (%) <sup>b</sup>                             | 9.5 (131.3)                                  | 5.4 (120.8)                | 7.0 (121.2)                |
| $R_{\text{pim}}$ (%) <sup>c</sup>                               | 2.4 (39.5)                                   | 1.3 (30.4)                 | 4.0 (72.8)                 |
| $I/\sigma(I)$                                                   | 27.9 (1.5)                                   | 55.8 (2.6)                 | 11.5 (2.1)                 |
| Wilson B-value (Å <sup>2</sup> )                                | 43.6                                         | 28.1                       | 20.2                       |
| <b>Phase determination</b>                                      |                                              |                            |                            |
| Anomalous scatterers                                            | Hg, 2 major sites                            |                            |                            |
| Figure of merit (42.65 – 2.90 Å)                                | 0.19 (0.61 after density modification)       |                            |                            |
| <b>Refinement statistics</b>                                    |                                              |                            |                            |
| Crystal                                                         | Native HopBF1                                |                            | Native HopBF1 + AMP-PNP    |
| Resolution range (Å)                                            | 42.60 – 2.47 (2.55 – 2.47)                   |                            | 36.22 – 1.90 (1.94 – 1.90) |
| No. of reflections $R_{\text{work}}/R_{\text{free}}$            | 15,558/1,555 (1,126/125)                     |                            | 29,703/1,996 (864/63)      |
| Data completeness (%)                                           | 99.0 (89.0)                                  |                            | 92.9 (42.0)                |
| Atoms (non-H protein, chain A/chain B/nucleotide/solvent/water) | 1,382/NA/NA/NA/25                            |                            | 1,376/1,370/62/20/232      |
| $R_{\text{work}}$ (%)                                           | 20.6 (26.2)                                  |                            | 20.8 (26.7)                |
| $R_{\text{free}}$ (%)                                           | 22.1 (30.1)                                  |                            | 24.0 (29.1)                |
| R.m.s.d. bond length (Å)                                        | 0.003                                        |                            | 0.007                      |

|                                                                                          |                    |                                     |
|------------------------------------------------------------------------------------------|--------------------|-------------------------------------|
| R.m.s.d. bond angle (°)                                                                  | 0.67               | 0.82                                |
| Mean B-value (Å <sup>2</sup> ) (non-H protein, chain A/chain B/nucleotide/solvent/water) | 47.9/NA/NA/NA/38.7 | 24.6/27.8/20.6/63.4/32.2            |
| Ramachandran plot (favored/additional/disallowed) <sup>d</sup> (%)                       | 95.4/4.0/0.6       | 98.6/1.4/0.0                        |
| Clashscore <sup>d</sup>                                                                  | 1.08               | 1.60                                |
| Maximum likelihood coordinate error                                                      | 0.27               | 0.21                                |
| Missing residues                                                                         | A: 0-24, 201-204.  | A: 0-24, 200-204. B: 0-24, 200-204. |

Data for the outermost shell are given in parentheses.

<sup>a</sup>Bijvoet-pairs were kept separate for data processing.

<sup>b</sup> $R_{\text{merge}} = 100 \frac{\sum_h \sum_i |I_{h,i} - \langle I_h \rangle|}{\sum_h \sum_i \langle I_{h,i} \rangle}$ , where the outer sum (h) is over the unique reflections and the inner sum (i) is over the set of independent observations of each unique reflection.

<sup>c</sup> $R_{\text{pim}} = 100 \frac{\sum_h \sum_i [1/(n_h - 1)]^{1/2} |I_{h,i} - \langle I_h \rangle|}{\sum_h \sum_i \langle I_{h,i} \rangle}$ , where  $n_h$  is the number of observations of reflections

**h.**

<sup>d</sup>As defined by the validation suite *MolProbity* (Chen et al., 2010).
